# Supplementary material for: Bone remodeling of the proximal tibia after uncemented total knee arthroplasty: secondary endpoints analyzed from a randomized trial comparing monoblock and modular tibia trays—2 year follow-up of 53 cases
Source: PubMed Central journal article supplement (PMC6746298; doi:10.1080/17453674.2019.1637178), 2019-07-04
Supplement: IORT_A_1637178_SM7846.pdf [file IORT_A_1637178_SM7846.pdf]

## Supplementary data

2-year follow-up results of BMD measurements of the proximal tibia (g/cm<sup>2</sup>), and ΔBMD (%) of the proximal tibia ROI 1, ROI 2, and ROI 3 and BMC (g) of the ankles (ROI 4).

|                                            | Postoperative |             | 3 months    |             | 6 months    |             | 12 months   |             | 24 months   |             |
|--------------------------------------------|---------------|-------------|-------------|-------------|-------------|-------------|-------------|-------------|-------------|-------------|
|                                            | Monoblock     | Modular     | Monoblock   | Modular     | Monoblock   | Modular     | Monoblock   | Modular     | Monoblock   | Modular     |
| <b>ROI 1, BMD (g/cm<sup>2</sup>)</b>       |               |             |             |             |             |             |             |             |             |             |
| Mean (SD)                                  | 0.93 (0.16)   | 0.87 (0.13) | 0.91 (0.17) | 0.90 (0.12) | 0.88 (0.18) | 0.89 (0.14) | 0.84 (0.15) | 0.88 (0.15) | 0.79 (0.22) | 0.86 (0.14) |
| ΔBMD (%)                                   |               |             | -1.3        | 3.7         | -4.7        | 3.2         | -9.4        | -0.2        | -15.0       | -0.01       |
| p-value <sup>a</sup>                       |               |             |             |             |             |             |             |             | 0.004       | 0.03        |
| p-value <sup>b</sup>                       |               |             |             |             |             |             |             |             | 0.03        |             |
| <b>ROI 2, BMD (g/cm<sup>2</sup>)</b>       |               |             |             |             |             |             |             |             |             |             |
| Mean (SD)                                  | 0.98 (0.17)   | 0.95 (0.13) | 0.98 (0.18) | 0.93 (0.20) | 0.96 (0.18) | 0.98 (0.16) | 0.92 (0.15) | 0.98 (0.16) | 0.85 (0.24) | 0.95 (0.17) |
| ΔBMD (%)                                   |               |             | 0.2         | -1.8        | -1.9        | 3.1         | -6.7        | 0.8         | -13.3       | 0.0         |
| p-value <sup>a</sup>                       |               |             |             |             |             |             |             |             | 0.01        | 0.5         |
| p-value <sup>b</sup>                       |               |             |             |             |             |             |             |             | 0.02        |             |
| <b>ROI 3, BMD (g/cm<sup>2</sup>)</b>       |               |             |             |             |             |             |             |             |             |             |
| Mean (SD)                                  | 1.13 (0.15)   | 1.13 (0.11) | 1.14 (0.18) | 1.15 (0.12) | 1.13 (0.21) | 1.14 (0.13) | 1.11 (0.18) | 1.13 (0.13) | 1.09 (0.18) | 1.13 (0.13) |
| ΔBMD (%)                                   |               |             | 1.0         | 1.3         | 0.1         | 0.8         | -1.5        | -0.2        | -3.5        | 0.0         |
| p-value <sup>a</sup>                       |               |             |             |             |             |             |             |             | 0.8         | 0.5         |
| p-value <sup>b</sup>                       |               |             |             |             |             |             |             |             | 1.0         |             |
| <b>Ankle of operated limb, BMC (g)</b>     |               |             |             |             |             |             |             |             |             |             |
| Mean (SD)                                  | 7.89 (0.49)   | 7.77 (0.42) | 7.50 (0.37) | 7.97 (0.34) | 7.70 (0.38) | 8.14 (0.33) | 7.54 (0.38) | 8.21 (0.36) | 7.60 (0.36) | 8.19 (0.32) |
| ΔBMD (%)                                   |               |             | -5.0        | 2.6         | -2.4        | 4.8         | -4.5        | 5.8         | -3.7        | 5.4         |
| p-value <sup>a</sup>                       |               |             |             |             |             |             |             |             | 0.7         | 0.6         |
| p-value <sup>b</sup>                       |               |             |             |             |             |             |             |             | 0.2         |             |
| <b>Ankle of non-operated limb, BMC (g)</b> |               |             |             |             |             |             |             |             |             |             |
| Mean (SD)                                  | 8.01 (0.39)   | 7.97 (0.40) | 8.05 (0.38) | 8.42 (0.30) | 8.09 (0.39) | 8.48 (0.35) | 7.75 (0.36) | 8.53 (0.34) | 7.94 (0.36) | 8.45 (0.34) |
| ΔBMC (%)                                   |               |             | 0.4         | 5.7         | 1.0         | 6.5         | -3.2        | 7.1         | -0.9        | 6.1         |
| p-value <sup>a</sup>                       |               |             |             |             |             |             |             |             | 0.9         | 0.4         |
| p-value <sup>b</sup>                       |               |             |             |             |             |             |             |             | 0.3         |             |

<sup>a</sup> Paired t-test for BMC change within groups

<sup>b</sup> Unpaired t-test for difference in BMC change between groups.
